# Supplementary material
Source: Springer Nature journal article supplement (https://www.springermedizin.de/resource/supplementary/12902_2008_55_MOESM5_ESM.pdf/9516138)
Supplement: MOESM5 [file 9516138]

| Region   | Clinical predictors     |        |                |          |       | Radiological predictors |                      |        |                |          | Comprehensive model |                     |                     |        |                |          |       |       |
|----------|-------------------------|--------|----------------|----------|-------|-------------------------|----------------------|--------|----------------|----------|---------------------|---------------------|---------------------|--------|----------------|----------|-------|-------|
|          | Variable                | R      | R <sup>2</sup> | β        | SE    | Beta                    | Variable             | R      | R <sup>2</sup> | β        | SE                  | Beta                | Variable            | R      | R <sup>2</sup> | β        | SE    | Beta  |
| Forefoot | model                   | 0,37** | <b>0,14</b>    |          |       |                         | model                | 0,42** | <b>0,18</b>    |          |                     |                     | model               | 0,51** | <b>0,26</b>    |          |       |       |
|          | Intercept               |        |                | 3,863**  | 0,038 |                         | Intercept            |        |                | 4,039**  | 0,200               |                     | Intercept           |        |                | 3,605**  | 0,065 |       |
|          | Valk score              |        |                | 0,019**  | 0,004 | 0,35                    | MT-1 phalanx angle   |        |                | 0,019**  | 0,005               | 0,40                | Valk score          |        |                | 0,028**  | 0,006 | 0,31  |
|          | Toe deformity (sum)     |        |                | 0,017**  | 0,076 | 0,29                    | Sesamoid height      |        |                | -0,043*  | 0,015               | -0,20               | Callus_sum          |        |                | 0,018*   | 0,006 | 0,21  |
|          |                         |        |                |          |       |                         | Med sesamoid Y dev   |        |                | -0,053*  | 0,015               | -0,24               | Moton's index       |        |                | 0,027*   | 0,008 | 0,22  |
|          |                         |        |                |          |       |                         |                      |        |                |          |                     | Deviation hallux rx |                     |        | 0,010*         | 0,003    | 0,20  |       |
| Hallux   | model                   | 0,49** | <b>0,24</b>    |          |       |                         | model                | 0,38** | <b>0,14</b>    |          |                     |                     | model               | 0,38** | <b>0,14</b>    |          |       |       |
|          | Intercept               |        |                | 3,886**  | 0,149 |                         | Intercept            |        |                | -0,128** | 0,708               |                     | Intercept           |        |                | -0,175** | 0,704 |       |
|          | Callus formation        |        |                | 0,176**  | 0,036 | 0,32                    | Nav 1st cuneiform    |        |                | 0,040**  | 0,010               | 0,28                | Nav 1st cuneiform   |        |                | 0,040**  | 0,010 | 0,28  |
|          | Calcaneus varus         |        |                | -0,266*  | 0,094 | -0,19                   | MT-5 inclination     |        |                | 0,033*   | 0,013               | 0,18                | MT-5 inclination    |        |                | 0,033*   | 0,013 | 0,18  |
|          | Dorsal flex ankle joint |        |                | -0,026*  | 0,008 | -0,22                   | Lat sesamoid Y dev   |        |                | 0,046*   | 0,018               | 0,18                | Med sesamoid Y dev  |        |                | 0,046*   | 0,018 | 0,18  |
|          | Height medial arch      |        |                | -0,151** | 0,043 | -0,23                   |                      |        |                |          |                     |                     |                     |        |                |          |       |       |
| MT-1     | model                   | 0,55** | <b>0,30</b>    |          |       |                         | model                | 0,42** | <b>0,19</b>    |          |                     |                     | model               | 0,58** | <b>0,34</b>    |          |       |       |
|          | Intercept               |        |                | 3,102**  | 0,058 |                         | Intercept            |        |                | 4,039**  | 0,200               |                     | Intercept           |        |                | 3,572**  | 0,170 |       |
|          | Valk score              |        |                | 0,025**  | 0,004 | 0,36                    | Sesamoid height      |        |                | -0,043** | 0,015               | -0,20               | Valk score          |        |                | 0,024**  | 0,004 | 0,35  |
|          | 1st toe deformity       |        |                | 0,271*   | 0,095 | 0,18                    | Med sesamoid Y dev   |        |                | -0,053*  | 0,015               | -0,24               | Callus formation    |        |                | 0,133**  | 0,025 | 0,33  |
|          | Callus formation        |        |                | 0,135**  | 0,026 | 0,33                    | MT-1 - phalanx angle |        |                | 0,019*   | 0,005               | -0,29               | Deviation hallux rx |        |                | 0,012*   | 0,004 | 0,20  |
|          |                         |        |                |          |       |                         |                      |        |                |          |                     | Med sesamoid Y dev  |                     |        | -0,051**       | 0,014    | -0,24 |       |
| MT-2     | model                   | 0,46** | <b>0,21</b>    |          |       |                         | model                | 0,40** | <b>0,16</b>    |          |                     |                     | model               | 0,50** | <b>0,25</b>    |          |       |       |
|          | Intercept               |        |                | 3,483**  | 0,064 |                         | Intercept            |        |                | 2,656**  | 0,260               |                     | Intercept           |        |                | 2,607**  | 0,237 |       |
|          | Callus formation        |        |                | 0,126**  | 0,026 | 0,33                    | Deviation hallux rx  |        |                | 0,016**  | 0,004               | 0,29                | Callus formation    |        |                | 0,134**  | 0,025 | 0,35  |
|          | 2nd toe deformity       |        |                | 0,111*   | 0,043 | 0,17                    | MT-2 thickness       |        |                | 0,118**  | 0,032               | 0,25                | MT-2 thickness      |        |                | 0,133**  | 0,031 | 0,29  |
|          | Valk                    |        |                | 0,005*   | 0,002 | 0,19                    | Moton's index        |        |                | 0,027*   | 0,009               | 0,20                | 2nd toe deformity   |        |                | 0,145*   | 0,042 | 0,23  |
| MT-3     | model                   | 0,35** | <b>0,12</b>    |          |       |                         | model                | 0,29** | <b>0,09</b>    |          |                     |                     | model               | 0,40** | <b>0,16</b>    |          |       |       |
|          | Intercept               |        |                | 3,251**  | 0,137 |                         | Intercept            |        |                | 3,531**  | 0,059               |                     | Intercept           |        |                | 3,220**  | 0,136 |       |
|          | Callus formation        |        |                | 0,102**  | 0,024 | 0,30                    | Moton's index        |        |                | 0,025*   | 0,008               | 0,22                | Callus formation    |        |                | 0,098**  | 0,023 | 0,29  |
|          | Body Mass Index         |        |                | 0,013*   | 0,005 | 0,20                    | Deviation hallux rx  |        |                | 0,010*   | 0,003               | 0,22                | Body Mass Index     |        |                | 0,013*   | 0,004 | 0,18  |
|          |                         |        |                |          |       |                         |                      |        |                |          |                     |                     | Moton's index       |        |                | 0,021*   | 0,008 | 0,20  |
| MT-4     | model                   | 0,26** | <b>0,07</b>    |          |       |                         | model                | 0,25** | <b>0,06</b>    |          |                     |                     | model               | 0,35** | <b>0,13</b>    |          |       |       |
|          | Intercept               |        |                | 3,263**  | 0,030 |                         | Intercept            |        |                | 2,030**  | 0,371               |                     | Intercept           |        |                | 2,026**  | 0,359 |       |
|          | Callus formation        |        |                | 0,095**  | 0,026 | 0,26                    | MT-4 length          |        |                | 0,018**  | 0,005               | 0,25                | Callus formation    |        |                | 0,091**  | 0,025 | 0,25  |
|          |                         |        |                |          |       |                         |                      |        |                |          |                     |                     | MT-4 lenght         |        |                | 0,017**  | 0,005 | 0,24  |
| MT-5     | model                   | 0,40** | <b>0,16</b>    |          |       |                         | model                | 0,47** | <b>0,22</b>    |          |                     |                     | model               | 0,54** | <b>0,29</b>    |          |       |       |
|          | Intercept               |        |                | 2,833**  | 0,056 |                         | Intercept            |        |                | 1,448*   | 0,596               |                     | Intercept           |        |                | 1,933**  | 0,575 |       |
|          | Callus formation        |        |                | 0,215**  | 0,036 | 0,40                    | MT-5 lenght          |        |                | 0,033**  | 0,008               | 0,27                | Callus formation    |        |                | 0,181**  | 0,034 | 0,34  |
|          |                         |        |                |          |       |                         | Moton's index        |        |                | -0,035*  | 0,013               | -0,18               | MT-5 lenght         |        |                | 0,023*   | 0,018 | 0,19  |
|          |                         |        |                |          |       |                         | MT-5 head height     |        |                | -0,096** | 0,019               | -0,34               | MT-5 head height    |        |                | -0,093** | 0,008 | -0,33 |

\* = p < .01,\*\* = p < .0001, MT = metatarsal, PIP = proximal interphalangeal, phalanx=phalangeal, nav=navicular, sum = summation of scores, med= medial, lat=lateral, dev =deviation
